# Supplementary material for: Combinatorial mutagenesis of rapidly evolving residues yields super-restrictor antiviral proteins
Source: PubMed Central journal article supplement (PMC6772013; doi:10.1371/journal.pbio.3000181), 2019-10-01
Supplement: pbio.3000181.s009.pdf [file pbio.3000181.s009.pdf]

**Figure 2B**

Western blots were incubated with anti-beta actin and anti-FLAG MxA antibodies overnight. Pictures were taken using a ChemiDoc Gel Imaging System adjusting for faint bands. The loading control bands were very faint even in this setting. To obtain a better image of the loading control, the blot was stripped using Thermo Scientific's Restore™ Western Blot Stripping Buffer as indicated by the manufacturer. The blots were then washed and incubated with anti-beta actin antibody only overnight followed by secondary HRP-conjugated antibody for 1 hour. After incubation with the substrate, images were re-taken adjusting for faint bands. The resulting images show the beta-actin bands and faint residual MxA bands.

**Figure 3A, 3B**

Western blots were imaged using the Odyssey® Fc detection system from LI-COR. The secondary antibodies from LI-COR were labeled with immunofluorescence dyes (IRDye® 800CW Goat anti-Rabbit IgG Secondary Antibody (product number: 926-32211); IRDye® 800CW Goat anti-Mouse IgG Secondary Antibody (product number: 926-32210); IRDye® 680LT Goat anti-Rabbit IgG Secondary Antibody (product number: 926-68021)).

**Figure 4A**

Western blots were incubated with anti-beta actin and anti-FLAG MxA antibodies overnight. The images show a strong signal for FLAG-MxA, but very faint loading band. The blot was cut in between the two lines and the loading controls were re-imaged.

**Figures 4B, 5A, 5B**

Western blots were incubated with anti-tubulin and anti-FLAG MxA antibodies overnight. Pictures were taken using a ChemiDoc Gel Imaging System adjusting for faint bands.

**Figure 4C, 4D**

Western blots were incubated with anti-beta actin and anti-FLAG MxA antibodies overnight. Pictures were taken using a ChemiDoc Gel Imaging System adjusting for faint bands.

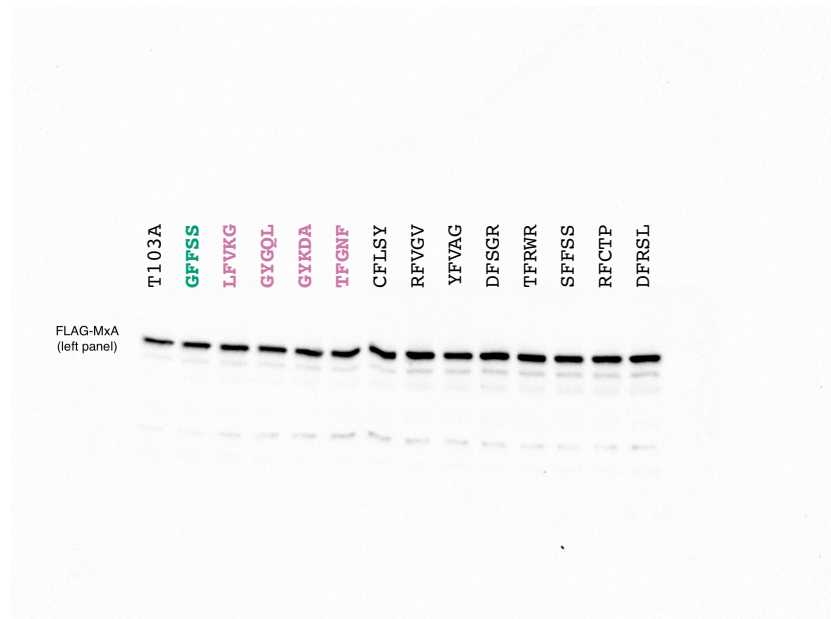

Fig 2B

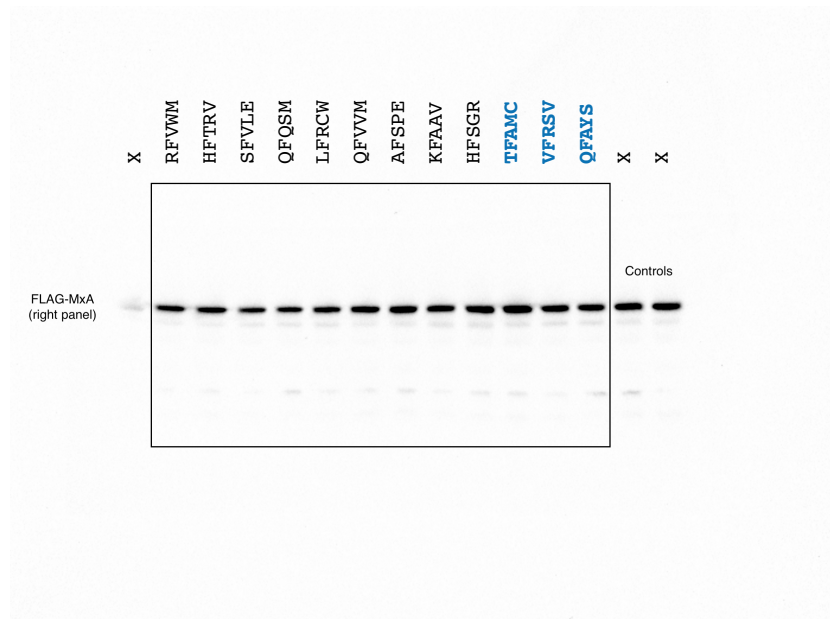

Fig 2B

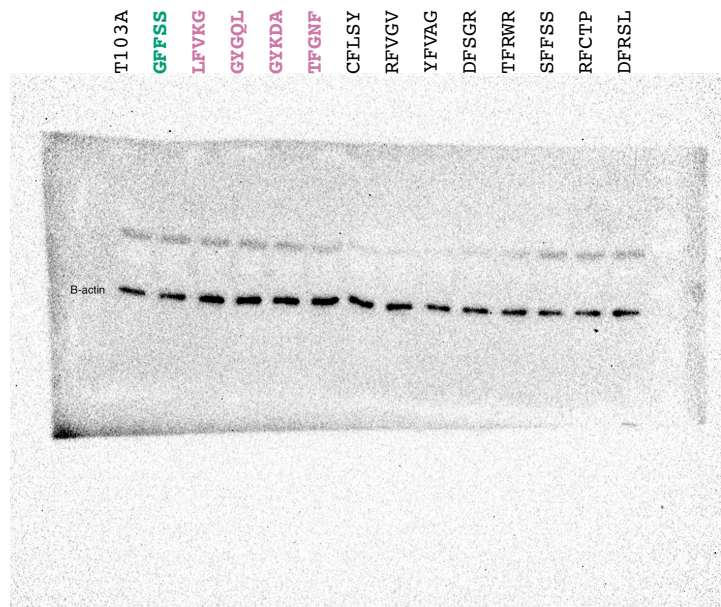

Fig 2B

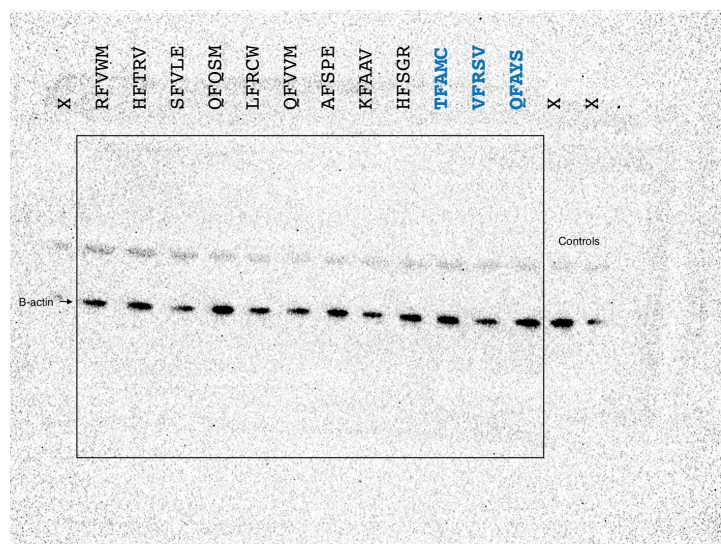

Fig 2B

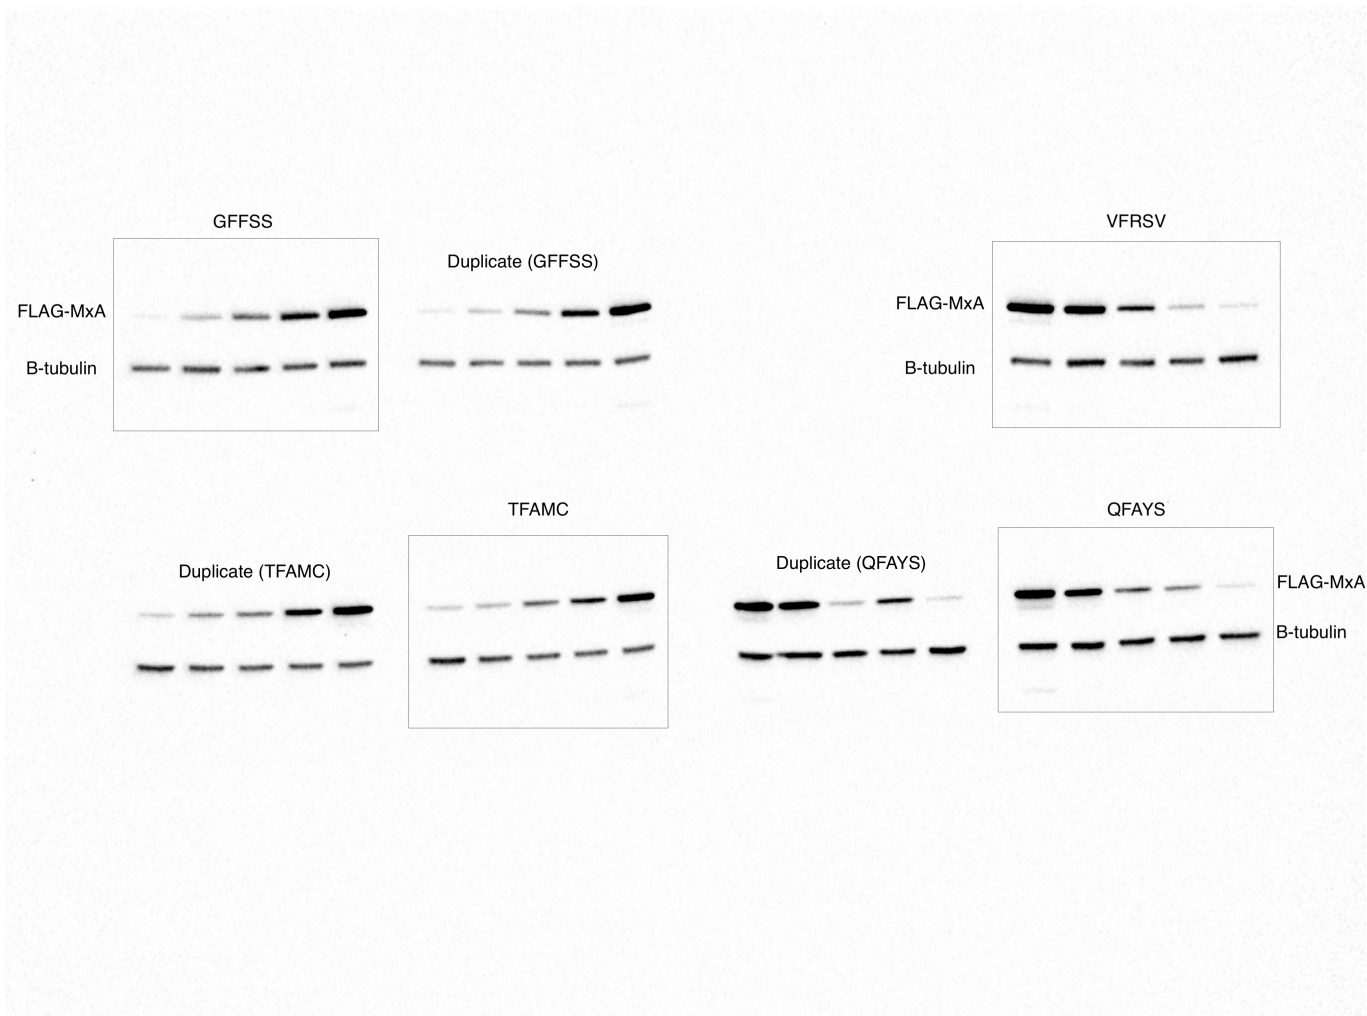

Fig 2C

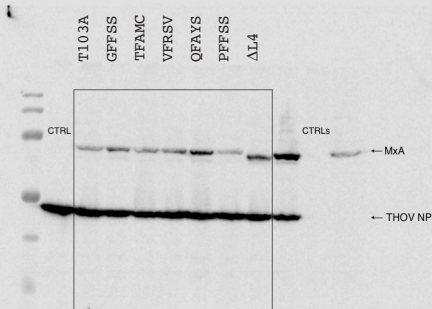

Fig 3A

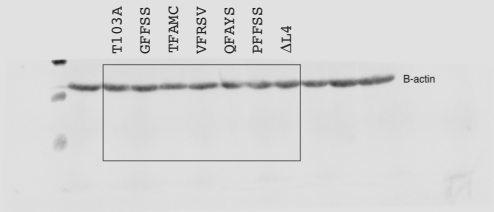

Fig 3A



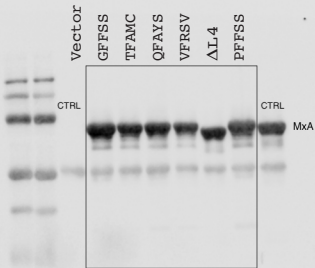

Fig 3B (top row)

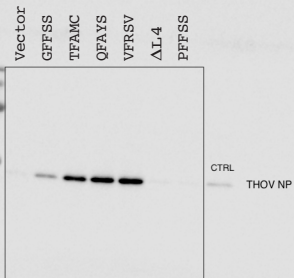

Fig 3B (2nd row)

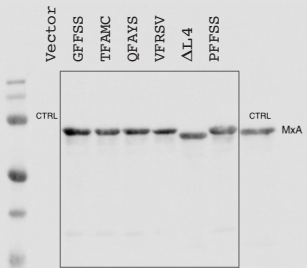

Fig 3B (3rd row)

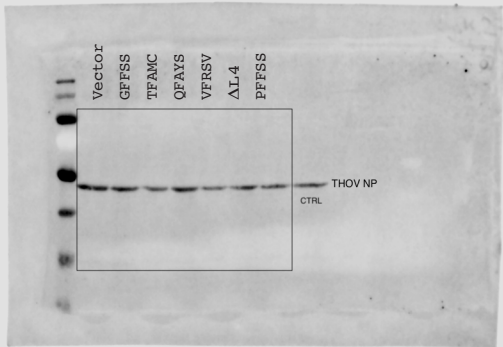

Fig 3B (4th row)

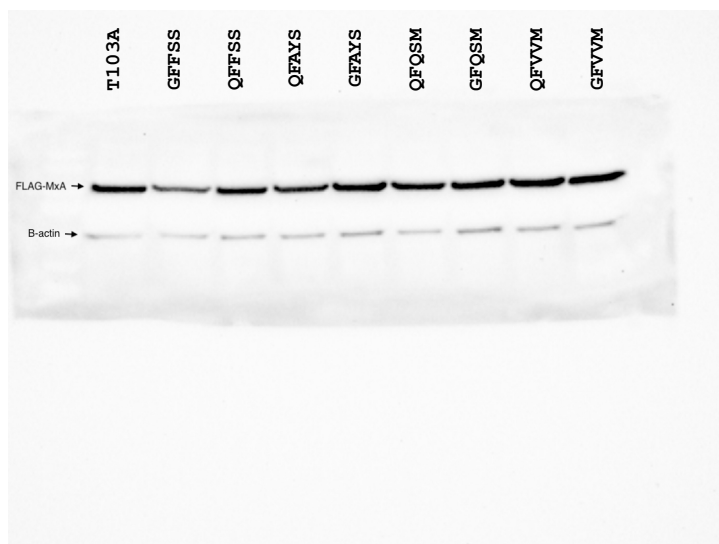

Fig 4A (top row)

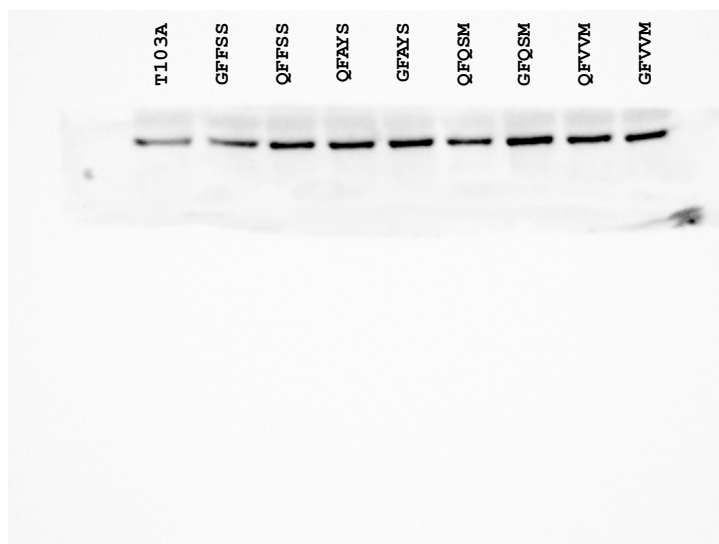

Fig 4A (bottom row)

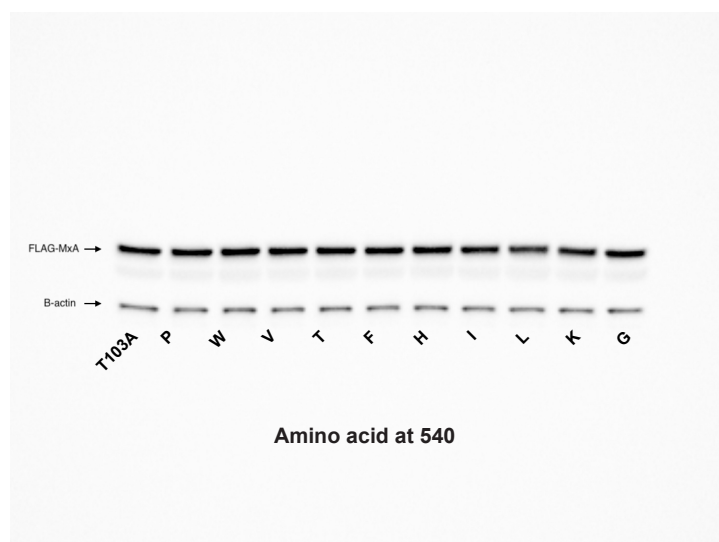

Fig 4B

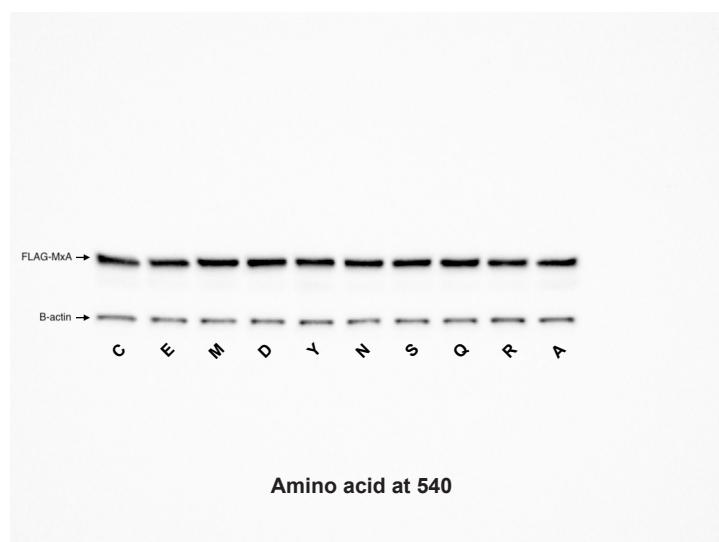

Fig 4B



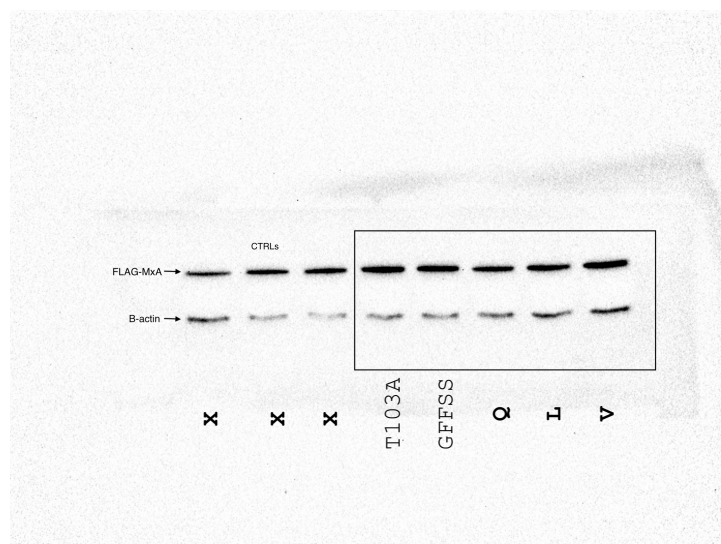

Fig 4C

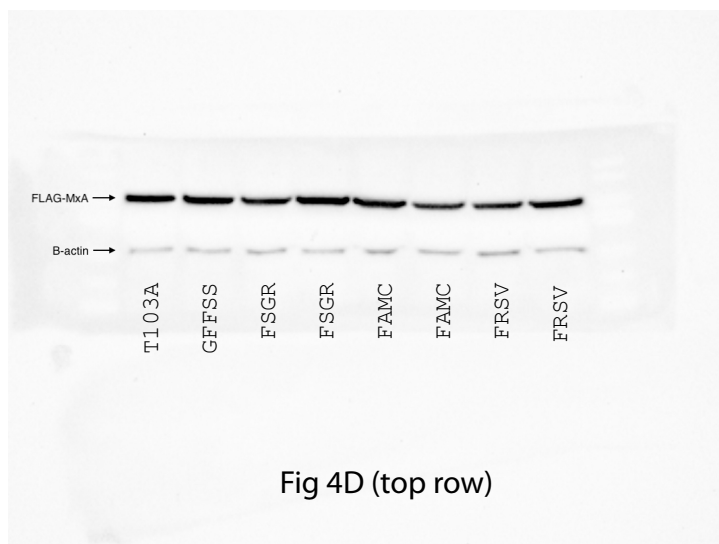

Fig 4D (top row)

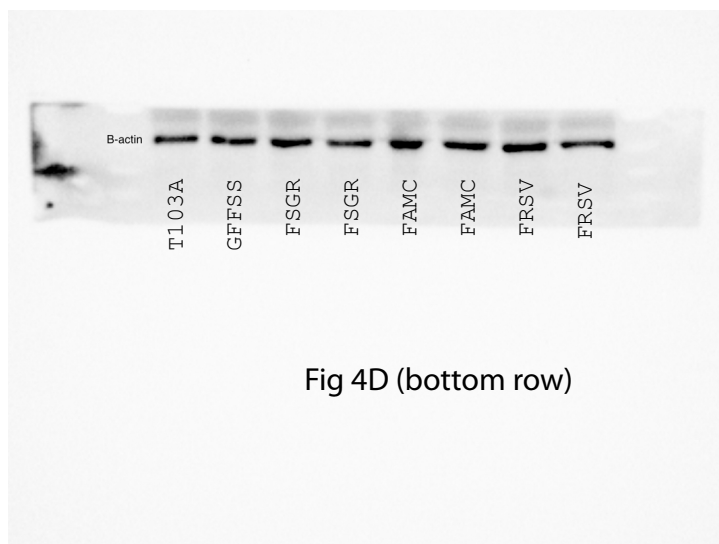

Fig 4D (bottom row)

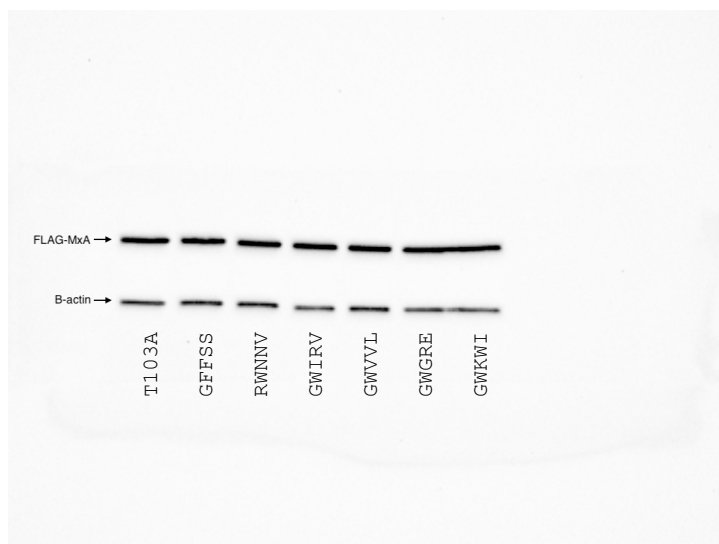

Fig 5A

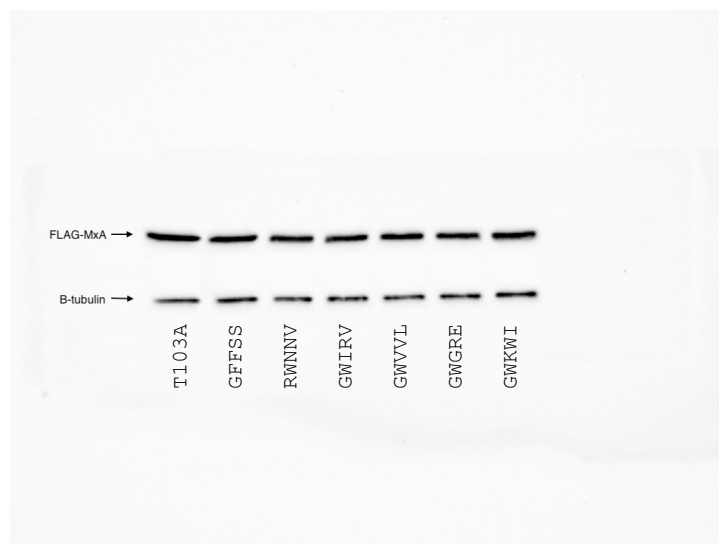

Fig 5B
